# Supplementary material for: Early-life exposure to low-dose oxidants can increase longevity via microbiome remodelling in Drosophila
Source: PubMed Central journal article supplement (PMC5841413; doi:10.1038/s41467-018-03070-w), 2018-03-07
Supplement: 41467_2018_3070_MOESM2_ESM.pdf [file 41467_2018_3070_MOESM2_ESM.pdf]

**Early-life exposure to low-dose oxidants can increase longevity via microbiome remodelling in *Drosophila***

Obata et al.

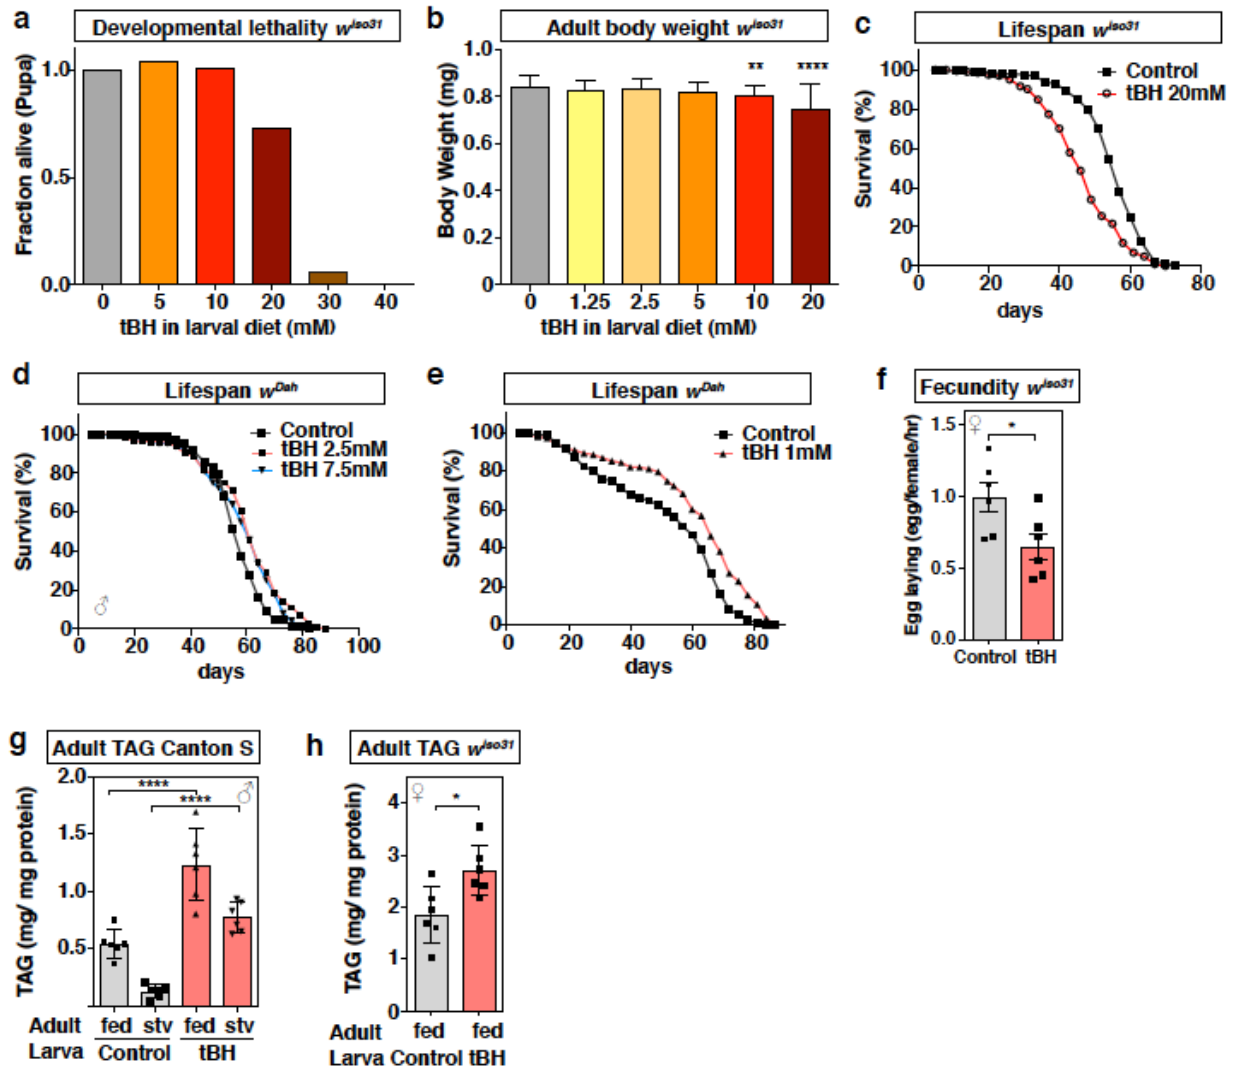

**Supplementary Figure 1, Low-dose tBH in the larval diet decreases fecundity but increases lifespan.** **a**, Fraction of  $w^{iso31}$  larvae exposed to different tBH concentrations (0-40mM) in standard diet that survive until pupariation ( $n > 200$ ). **b**, Adult body weights of  $w^{iso31}$  male flies raised on different tBH concentrations in the standard diet. Mean  $\pm$  SEM ( $n = 50$ ). **c**, Lifespan of  $w^{iso31}$  male flies raised on 20mM tBH. **d,e**, Lifespan of  $w^{Dah}$  male (**d**) or female (**e**) flies raised on 1-7.5mM tBH. **f**, Fecundity of  $w^{iso31}$  female flies raised on 5mM tBH. Mean  $\pm$  SEM ( $n = 6$ ). **g,h**, Whole body TAG (mg/mg of protein) in Canton S male (**g**) or  $w^{iso31}$  female (**h**) flies raised on 5mM tBH with or without 24-hour starvation. Mean  $\pm$  SEM ( $n = 6$ ). Asterisks indicate  $*p < 0.05$ ,  $**p < 0.01$ ,  $****p < 0.0001$ , see Materials and Methods for details of statistical tests used in this and subsequent all figures. Statistics for lifespan curves are shown in Supplementary Table 1.

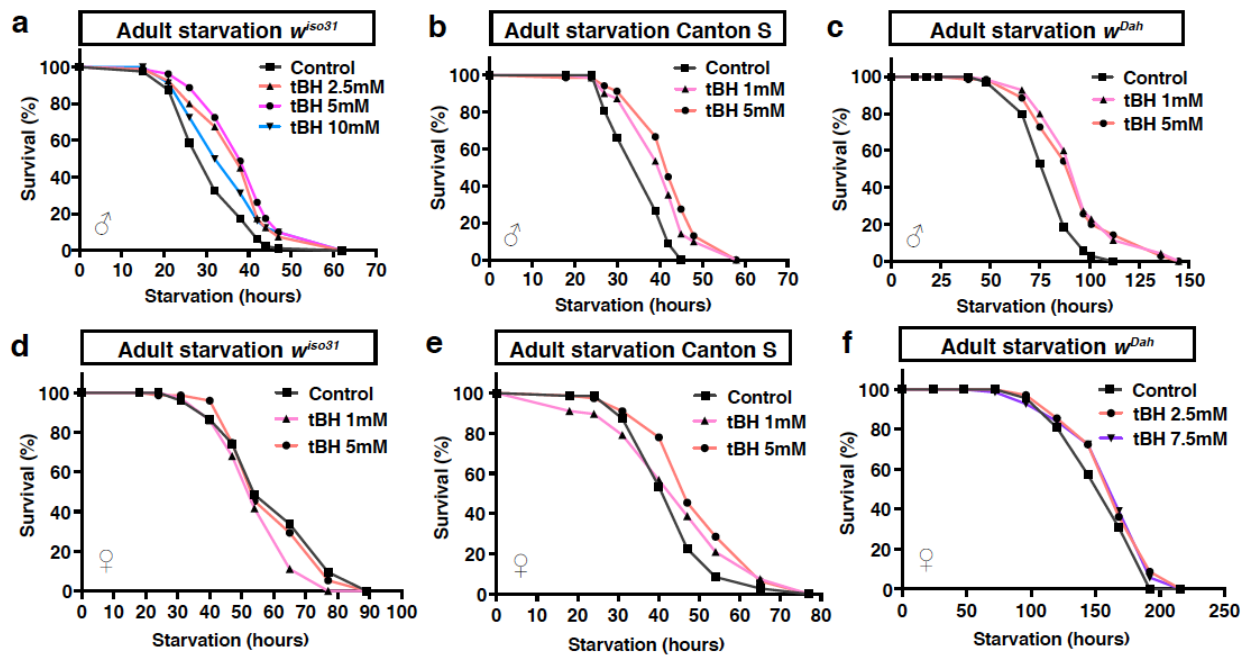

**Supplementary Figure 2, tBH-experienced flies are resistant to starvation stress. a-f,** Starvation survival curves for *w<sup>iso31</sup>* (**a,d**), Canton S (**b,e**), and *w<sup>Dah</sup>* (**c,f**) flies on PBS/agar medium. Either male (**a-c**) or female (**d-f**) flies were used. Statistics for survival curves are in Supplementary Table 1.

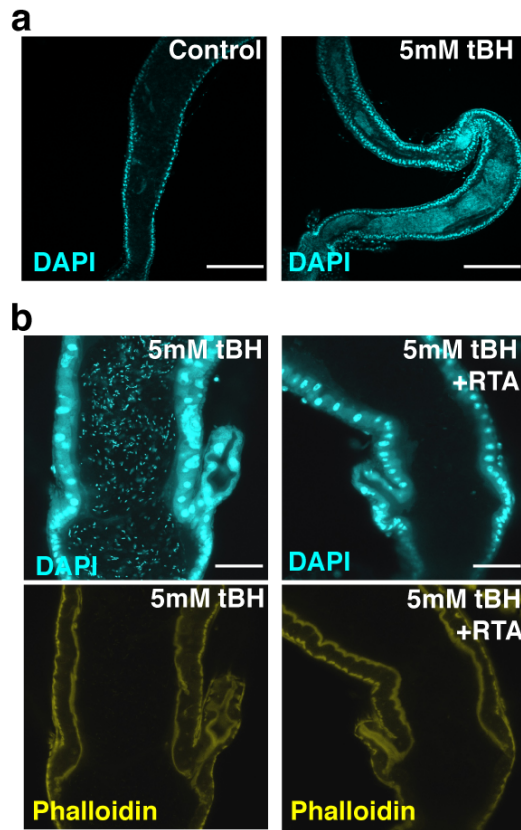

**Supplementary Figure 3, Larval tBH exposure increases DAPI<sup>+</sup> bacteria in the adult gut.**  
**a**, Representative image of DAPI staining of the adult *w<sup>iso31</sup>* male gut. Scale bar, 200  $\mu$ m. **b**, Images of DAPI and phalloidin staining of *w<sup>iso31</sup>* adult male at midgut/hindgut junction after 6 days on standard diet without (left) or with (right) the RTA antibiotic cocktail (Rifamycin, Tetracycline, and Ampicillin). Scale bar, 50  $\mu$ m.

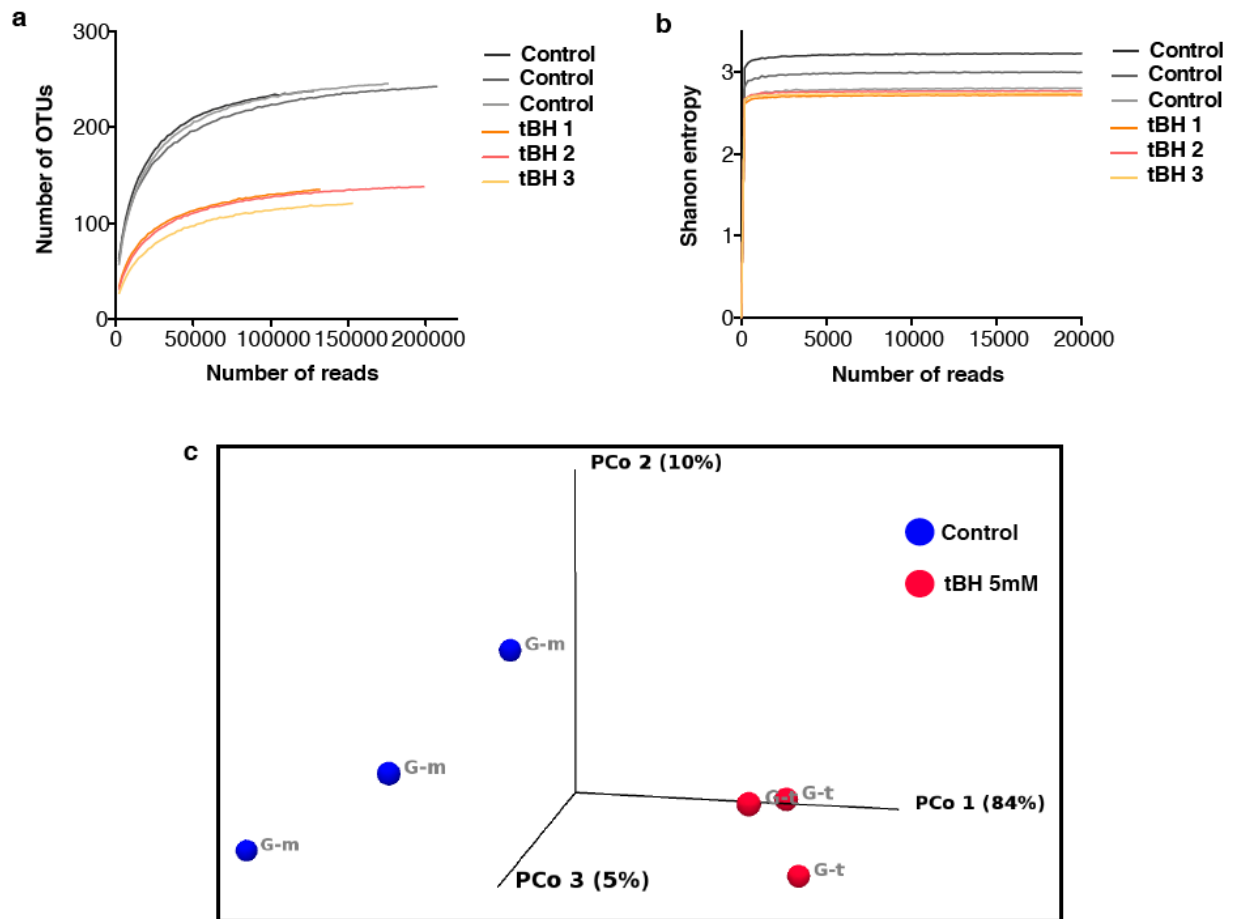

**Supplementary Figure 4, Gut microbiome diversity indices of control versus tBH-experienced flies.** Rarefaction curves (a), Shannon entropy (b) and PCo plot of Bray-Curtis dissimilarity (c) for triplicate samples from control or tBH-experienced flies.

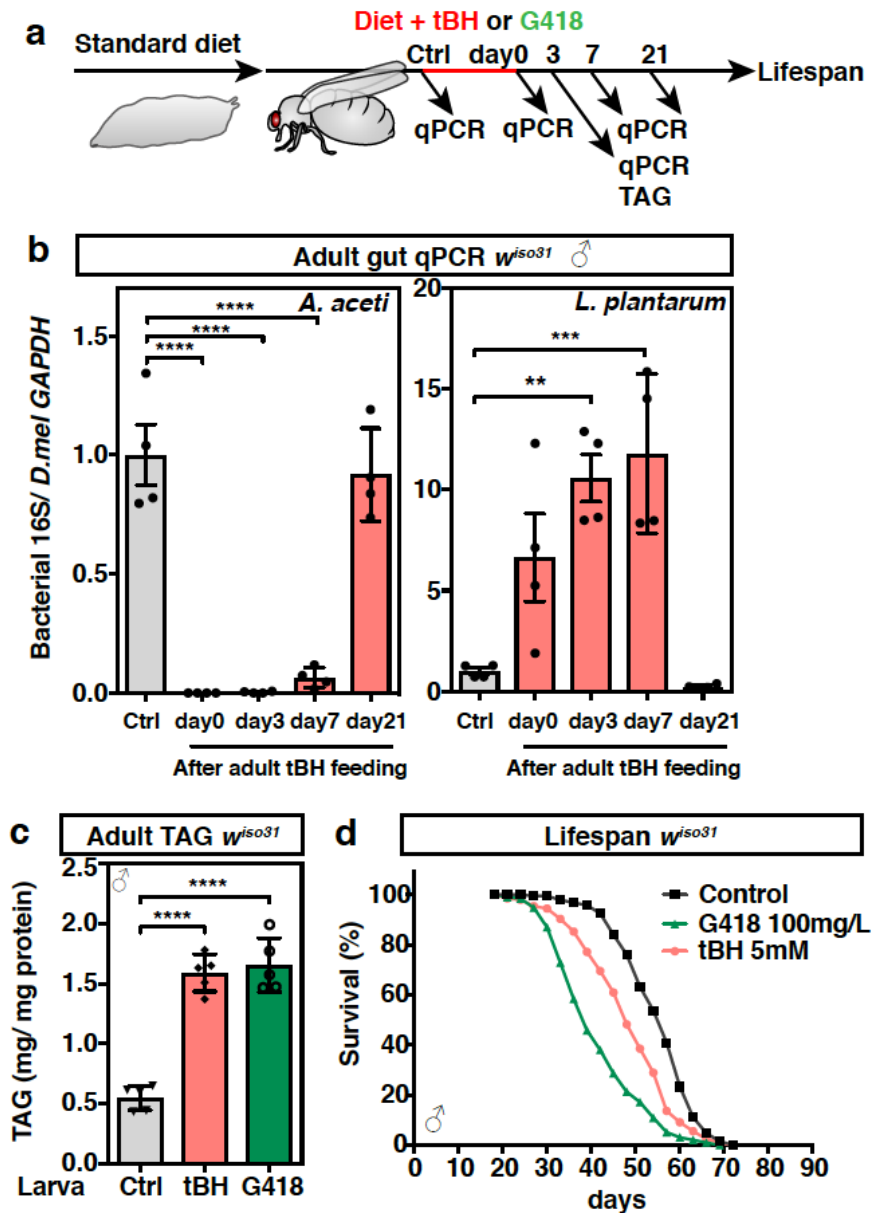

**Supplementary Figure 5, Adult onset tBH does not stably deplete *A. aceti* or extend lifespan but it does increase TAG storage.** **a**, Outline of experimental strategy. **b**, Quantitative PCR analysis of bacteria from  $w^{iso31}$  adult male guts using species-specific primers. Adult male flies were fed 5mM tBH-containing diet for 6 days and then transferred to standard diet for a further 0, 3, 7 or 21 days before analysis. Control (Ctrl) samples were collected prior to the start of tBH exposure as shown in A. Mean  $\pm$  SEM ( $n=4$ ). **c**, Whole body TAG (mg/mg of protein) in  $w^{iso31}$  male flies 3 days after a 6-day exposure to G418 (100mg/L) or tBH (5mM) as shown in a. Mean  $\pm$  SEM ( $n=5$ ). **d**, Lifespan of  $w^{iso31}$  male flies exposed as adults to G418 or tBH for 6 days. Asterisks indicate \*\* $p<0.01$ , \*\*\* $p<0.001$ , \*\*\*\* $p<0.0001$ . Statistics for survival curves are shown in Supplementary Table 1.

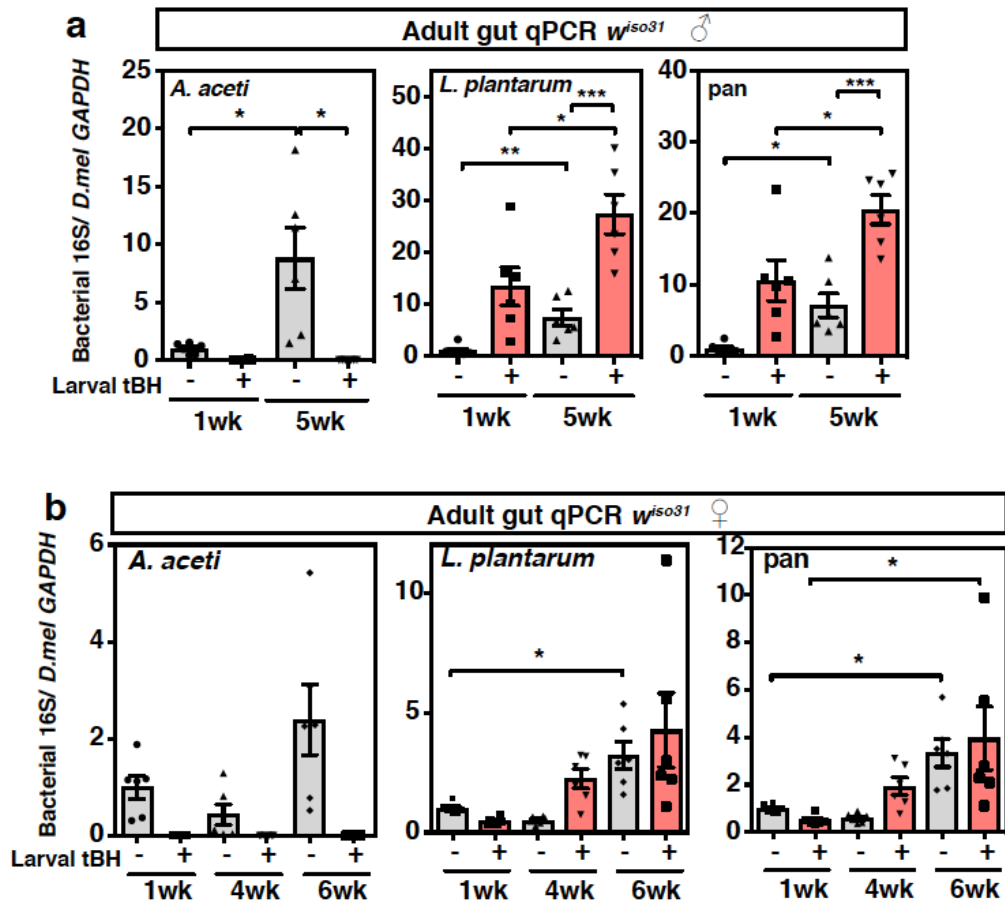

**Supplementary Figure 6, tBH-experienced flies show an age-related increase in gut bacteria but life-long depletion of *A. aceti*.** a,b, Quantitative PCR analysis of bacteria from the adult gut of *wiso31* male (a) or female (b) flies of various ages using species-specific or pan primers. Mean  $\pm$  SEM ( $n=6$ ). Asterisks indicate \* $p<0.05$ , \*\* $p<0.01$ , \*\*\* $p<0.001$ .

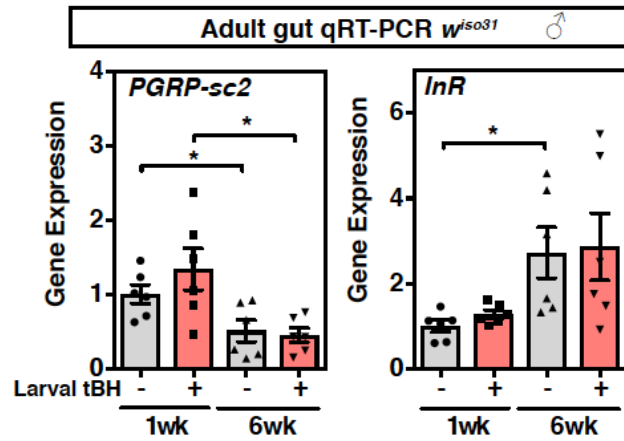

**Supplementary Figure 7, Larval tBH does not inhibit age-related dFoxO activation in the adult gut.** Quantitative RT-PCR analysis of the dFoxO targets *PGRP-sc2* and *InR* in the gut of young (1 week) or old (6 week) *w<sup>iso31</sup>* male flies. Mean  $\pm$  SEM ( $n=6$ ). Asterisks indicate  $*p<0.05$ .



**Supplementary Table 1, Statistics for survival curves.** Cohort sizes, mean and median lifespans, percentage changes, and log-rank tests for Kaplan-Meier survival curves in this study.

| Fig.1b    | <i>n</i> | mean(% change) | median(% change) | Log-rank (vs control) |
|-----------|----------|----------------|------------------|-----------------------|
| Control   | 192      | 59.49          | 59               | -                     |
| tBH1.25mM | 205      | 70.4 (+18.3%)  | 71 (+20.3%)      | <i>p</i> <0.0001      |
| tBH2.5mM  | 202      | 66.66 (+12.1%) | 68 (+15.3%)      | <i>p</i> <0.0001      |
| tBH5mM    | 207      | 71.2 (+19.7%)  | 71 (+20.3%)      | <i>p</i> <0.0001      |
| tBH10mM   | 200      | 69.83 (+17.4%) | 71 (+20.3%)      | <i>p</i> <0.0001      |

  

| Fig.1c  | <i>n</i> | mean(% change) | median(% change) | Log-rank (vs control) |
|---------|----------|----------------|------------------|-----------------------|
| Control | 196      | 59.6           | 62               | -                     |
| tBH1mM  | 127      | 69.58 (+16.7%) | 71 (+14.5%)      | <i>p</i> <0.0001      |
| tBH5mM  | 200      | 66.67 (+11.9%) | 71 (+14.5%)      | <i>p</i> <0.0001      |

  

| Fig.1d  | <i>n</i> | mean(% change) | median(% change) | Log-rank (vs control) |
|---------|----------|----------------|------------------|-----------------------|
| Control | 195      | 42.45          | 43               | -                     |
| tBH5mM  | 162      | 54.5 (+28.4%)  | 55.2 (+27.9%)    | <i>p</i> <0.0001      |

  

| Fig.1e  | <i>n</i> | mean(% change) | median(% change) | Log-rank (vs control) |
|---------|----------|----------------|------------------|-----------------------|
| Control | 191      | 40.52          | 44               | -                     |
| tBH1mM  | 124      | 49.71 (+22.7%) | 56 (+27.3%)      | <i>p</i> <0.0001      |
| tBH5mM  | 196      | 49.69 (+22.6%) | 59 (+34.1%)      | <i>p</i> <0.0001      |

  

| Fig.1f  | <i>n</i> | mean(% change) | median(% change) | Log-rank (vs control) |
|---------|----------|----------------|------------------|-----------------------|
| Control | 191      | 52.77          | 54               | -                     |
| PQ1mM   | 170      | 59.22 (+12.2%) | 60 (+11.1%)      | <i>p</i> <0.0001      |

  

| Fig.S1c | <i>n</i> | mean(% change) | median(% change) | Log-rank (vs control) |
|---------|----------|----------------|------------------|-----------------------|
| Control | 200      | 55.06          | 57               | -                     |
| tBH20mM | 206      | 46.47 (+15.6%) | 46 (-19.3%)      | <i>p</i> <0.0001      |

  

| Fig.S1d  | <i>n</i> | mean(% change) | median(% change) | Log-rank (vs control) |
|----------|----------|----------------|------------------|-----------------------|
| Control  | 198      | 56.69          | 58               | -                     |
| tBH2.5mM | 212      | 60.07 (+6.0%)  | 61 (+5.2%)       | <i>p</i> <0.0001      |
| tBH7.5mM | 204      | 58.57 (+3.3%)  | 61 (+5.2%)       | <i>p</i> =0.0011      |

  

| Fig.S1e | <i>n</i> | mean(% change) | median(% change) | Log-rank (vs control) |
|---------|----------|----------------|------------------|-----------------------|
| Control | 139      | 52.18          | 60               | -                     |
| tBH 1mM | 134      | 60.93 (+16.8%) | 66 (+10.0%)      | <i>p</i> <0.0001      |

  

| Fig.2d   | <i>n</i> | mean(% change) | median(% change) | Log-rank (vs control) |
|----------|----------|----------------|------------------|-----------------------|
| Control  | 79       | 4.32           | 5                | -                     |
| tBH2.5mM | 80       | 4.33 (0.2%)    | 5 (0%)           | <i>p</i> =0.8983      |
| tBH5mM   | 80       | 4.06 (-6.0%)   | 4 (-20%)         | <i>p</i> =0.2338      |
| tBH10mM  | 80       | 3.84 (-11.1%)  | 4 (-20%)         | <i>p</i> =0.0113      |

  

| Fig.2e  | <i>n</i> | mean(% change) | median(% change) | Log-rank (vs control) |
|---------|----------|----------------|------------------|-----------------------|
| Control | 74       | 61.18          | 70               | -                     |
| tBH5mM  | 74       | 50.12 (-18.1%) | 47 (-32.9%)      | <i>p</i> =0.0009      |

  

| Fig.S2a  | <i>n</i> | mean(% change) | median(% change) | Log-rank (vs control) |
|----------|----------|----------------|------------------|-----------------------|
| Control  | 80       | 31.79          | 32               | -                     |
| tBH2.5mM | 80       | 38.05 (+19.7%) | 38 (+18.8%)      | <i>p</i> <0.0001      |
| tBH5mM   | 80       | 39.91 (+25.5%) | 38 (+18.8%)      | <i>p</i> <0.0001      |
| tBH10mM  | 80       | 36.36 (+14.4%) | 38 (+18.8%)      | <i>p</i> =0.0041      |

| Fig.S2b | <i>n</i> | mean(% change) | median(% change) | Log-rank (vs control) |
|---------|----------|----------------|------------------|-----------------------|
| Control | 68       | 36.44          | 39               | -                     |
| tBH1mM  | 71       | 42.38 (+16.3%) | 42 (+7.7%)       | <i>p</i> <0.0001      |
| tBH5mM  | 69       | 44.43 (+21.9%) | 42 (+7.7%)       | <i>p</i> <0.0001      |

| Fig.S2c | <i>n</i> | mean(% change) | median(% change) | Log-rank (vs control) |
|---------|----------|----------------|------------------|-----------------------|
| Control | 70       | 81.43          | 87               | -                     |
| tBH1mM  | 70       | 96.04 (+17.9%) | 97 (+11.5%)      | <i>p</i> <0.0001      |
| tBH5mM  | 70       | 94.41 (+15.9%) | 97 (+11.5%)      | <i>p</i> <0.0001      |

| Fig.S2d | <i>n</i> | mean(% change) | median(% change) | Log-rank (vs control) |
|---------|----------|----------------|------------------|-----------------------|
| Control | 74       | 61.43          | 54               | -                     |
| tBH1mM  | 72       | 56.46 (-8.1%)  | 54 (0%)          | <i>p</i> =0.0077      |
| tBH5mM  | 75       | 60.88 (-0.9%)  | 54 (0%)          | <i>p</i> =0.5896      |

| Fig.S2e | <i>n</i> | mean(% change) | median(% change) | Log-rank (vs control) |
|---------|----------|----------------|------------------|-----------------------|
| Control | 71       | 45.27          | 47               | -                     |
| tBH1mM  | 67       | 46.73 (+3.2%)  | 47 (0%)          | <i>p</i> =0.1473      |
| tBH5mM  | 77       | 51.48 (+13.7%) | 47 (0%)          | <i>p</i> =0.0005      |

| Fig.S2f  | <i>n</i> | mean(% change) | median(% change) | Log-rank (vs control) |
|----------|----------|----------------|------------------|-----------------------|
| Control  | 68       | 159.53         | 168              | -                     |
| tBH2.5mM | 69       | 168 (+5.3%)    | 168 (0%)         | <i>p</i> =0.0685      |
| tBH7.5mM | 69       | 166.26 (+4.2%) | 168 (0%)         | <i>p</i> =0.0843      |

| Fig.4e      | <i>n</i> | mean(% change) | median(% change) | Log-rank (vs control) |
|-------------|----------|----------------|------------------|-----------------------|
| Control     | 175      | 51.5           | 53               | -                     |
| tBH0.5mM    | 168      | 56.89 (+10.5%) | 59 (+11.3%)      | <i>p</i> <0.0001      |
| G418 25mg/L | 171      | 57.78 (+12.2%) | 59 (+11.3%)      | <i>p</i> <0.0001      |

| Fig.5d       | <i>n</i> | mean(% change) | median(% change) | Log-rank (vs control) |
|--------------|----------|----------------|------------------|-----------------------|
| Control      | 209      | 51.16          | 52               | -                     |
| tBH5mM at F0 | 198      | 56.37 (+10.2%) | 57 (+9.6%)       | <i>p</i> <0.0001      |

| Fig.S5d      | <i>n</i> | mean(% change) | median(% change) | Log-rank (vs control) |
|--------------|----------|----------------|------------------|-----------------------|
| Control      | 188      | 55.23          | 57               | -                     |
| tBH5mM       | 197      | 48.52 (-12.1%) | 48 (-15.85%)     | <i>p</i> <0.0001      |
| G418 100mg/L | 192      | 41.52 (-24.8%) | 39 (-31.6%)      | <i>p</i> <0.0001      |

| Fig.6c        | <i>n</i> | mean(% change) | median(% change) | Log-rank (vs control)                                                      |
|---------------|----------|----------------|------------------|----------------------------------------------------------------------------|
| Control       | 78       | 45.47          | 44               | -                                                                          |
| Control-RTA   | 82       | 60.12 (+32.2%) | 58 (+31.8%)      | <i>p</i> <0.0001                                                           |
| Control-MVNTA | 75       | 59.64 (+31.2%) | 58 (+31.8%)      | <i>p</i> <0.0001                                                           |
| tBH5mM        | 79       | 53.32 (+17.3%) | 52 (+18.2%)      | <i>p</i> <0.0001                                                           |
| tBH5mM-RTA    | 79       | 57.8 (+27.1%)  | 58 (+31.8%)      | <i>p</i> <0.0001                                                           |
| tBH5mM-MVNTA  | 84       | 57.81 (+27.1%) | 58 (+31.8%)      | <i>p</i> =0.1075 (vs tBH)<br><i>p</i> <0.0001<br><i>p</i> =0.0489 (vs tBH) |

| Fig.6d        | <i>n</i> | mean(% change) | median(% change) | Log-rank (vs control)                                                      |
|---------------|----------|----------------|------------------|----------------------------------------------------------------------------|
| Control       | 151      | 58.55          | 61               | -                                                                          |
| Control-RTA   | 151      | 71.31 (+21.8%) | 79 (+29.5%)      | <i>p</i> <0.0001                                                           |
| Control-MVNTA | 153      | 69.2 (+18.2%)  | 76 (+24.6%)      | <i>p</i> <0.0001                                                           |
| tBH5mM        | 144      | 62.6 (+6.9%)   | 64 (+4.9%)       | <i>p</i> <0.0001                                                           |
| tBH5mM-RTA    | 150      | 67.76 (+15.7%) | 73 (+19.7%)      | <i>p</i> <0.0001                                                           |
| tBH5mM-MVNTA  | 152      | 63.73 (+8.8%)  | 67 (+9.8%)       | <i>p</i> <0.0001 (vs tBH)<br><i>p</i> <0.0001<br><i>p</i> =0.3526 (vs tBH) |

| Fig.6e      | <i>n</i> | mean(% change) | median(% change) | Log-rank (vs control)                         |
|-------------|----------|----------------|------------------|-----------------------------------------------|
| Control     | 139      | 52.22          | 56               | -                                             |
| Control-RTA | 143      | 56.93 (+9.0%)  | 65 (+16.1%)      | <i>p</i> <0.0001                              |
| tBH 5mM     | 144      | 59.37 (+13.7%) | 65 (+16.1%)      | <i>p</i> <0.0001                              |
| tBH 5mM-RTA | 139      | 62.82 (+20.3%) | 68 (+21.4%)      | <i>p</i> <0.0001<br><i>p</i> =0.0054 (vs tBH) |

| Fig.7e      | <i>n</i> | mean(% change) | median(% change) | Log-rank (vs control)                        |
|-------------|----------|----------------|------------------|----------------------------------------------|
| Control     | 161      | 51.6           | 51               | -                                            |
| Control-FO1 | 149      | 52.67 (+2.1%)  | 54 (+5.9%)       | <i>p</i> =0.0229                             |
| tBH5mM      | 155      | 55.39 (+7.3%)  | 54 (+5.9%)       | <i>p</i> <0.0001                             |
| tBH5mM-FO1  | 158      | 51.9 (+0.6%)   | 51 (0%)          | <i>p</i> =0.3497<br><i>p</i> <0.0001(vs tBH) |

| Fig.7f      | <i>n</i> | mean(% change) | median(% change) | Log-rank (vs control)                       |
|-------------|----------|----------------|------------------|---------------------------------------------|
| Control     | 178      | 56.9           | 57               | -                                           |
| Control-FO1 | 183      | 58.55 (+2.90%) | 60 (+5.26%)      | <i>p</i> =0.0171                            |
| Control-FO2 | 175      | 56.58 (-0.56%) | 57 (0%)          | <i>p</i> =0.5587                            |
| PQ 1mM      | 177      | 64.94 (+14.1%) | 66 (+15.8%)      | <i>p</i> <0.0001                            |
| PQ 1mM-FO1  | 175      | 54.92 (-3.48%) | 57 (0%)          | <i>p</i> =0.132<br><i>p</i> <0.0001 (vs PQ) |
| PQ 1mM-FO2  | 152      | 63.73 (+8.8%)  | 67 (+9.8%)       | <i>p</i> =0.993<br><i>p</i> <0.0001 (vs PQ) |
